# Supplementary material for: Soils of Amazonia with particular reference to the RAINFOR sites
Source: Copernicus journal article supplement (doi:10.5194/bg-8-1415-2011), 2011-06-01
Supplement: Supplementary file 1 [file bg-8-1415-2011-supplement.pdf]

### Supplementary Information.

The following maps have been developed with an identical methodology as Fig. 4 in the main text, but show each of the WRB soil groups plotted separately.

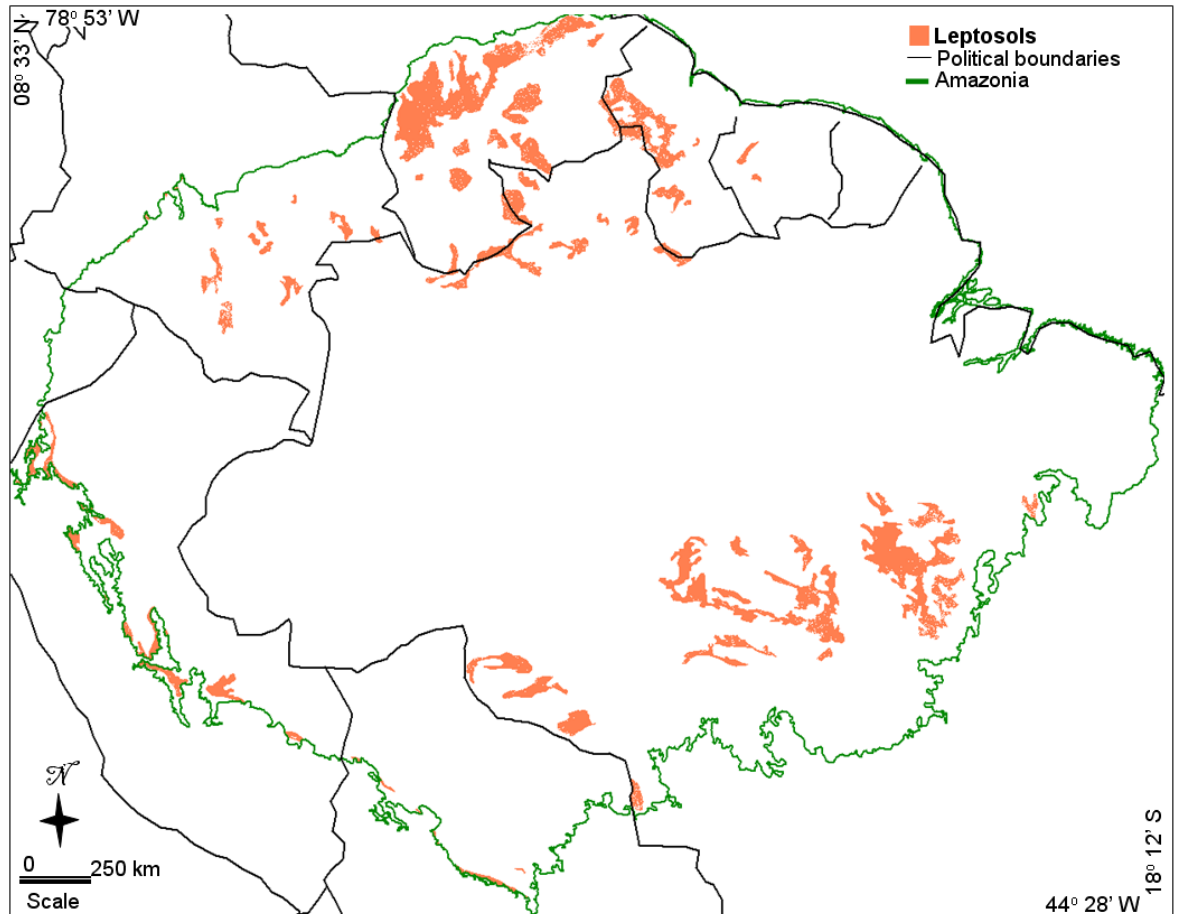

Fig. S1. Distribution of Leptosols.

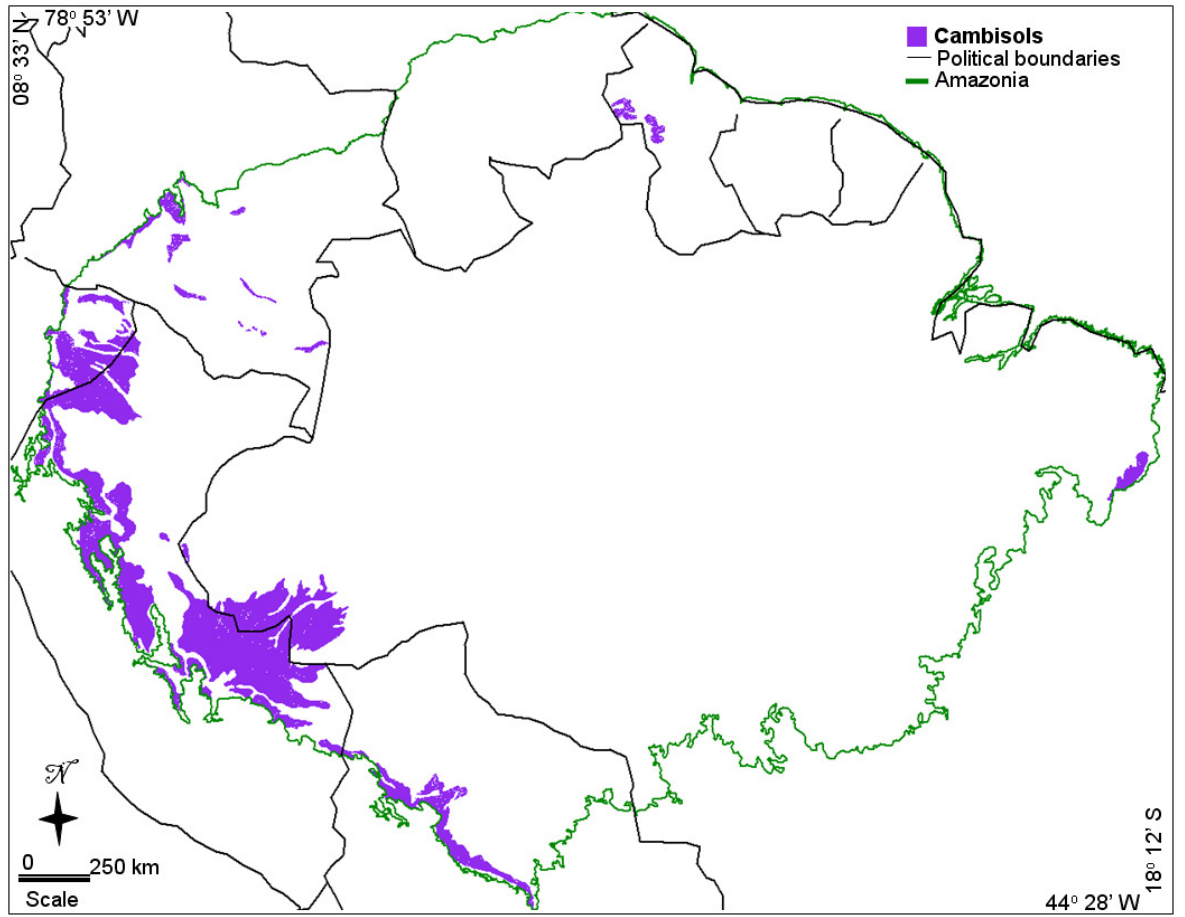

Fig. S2. Distribution of Cambisols.

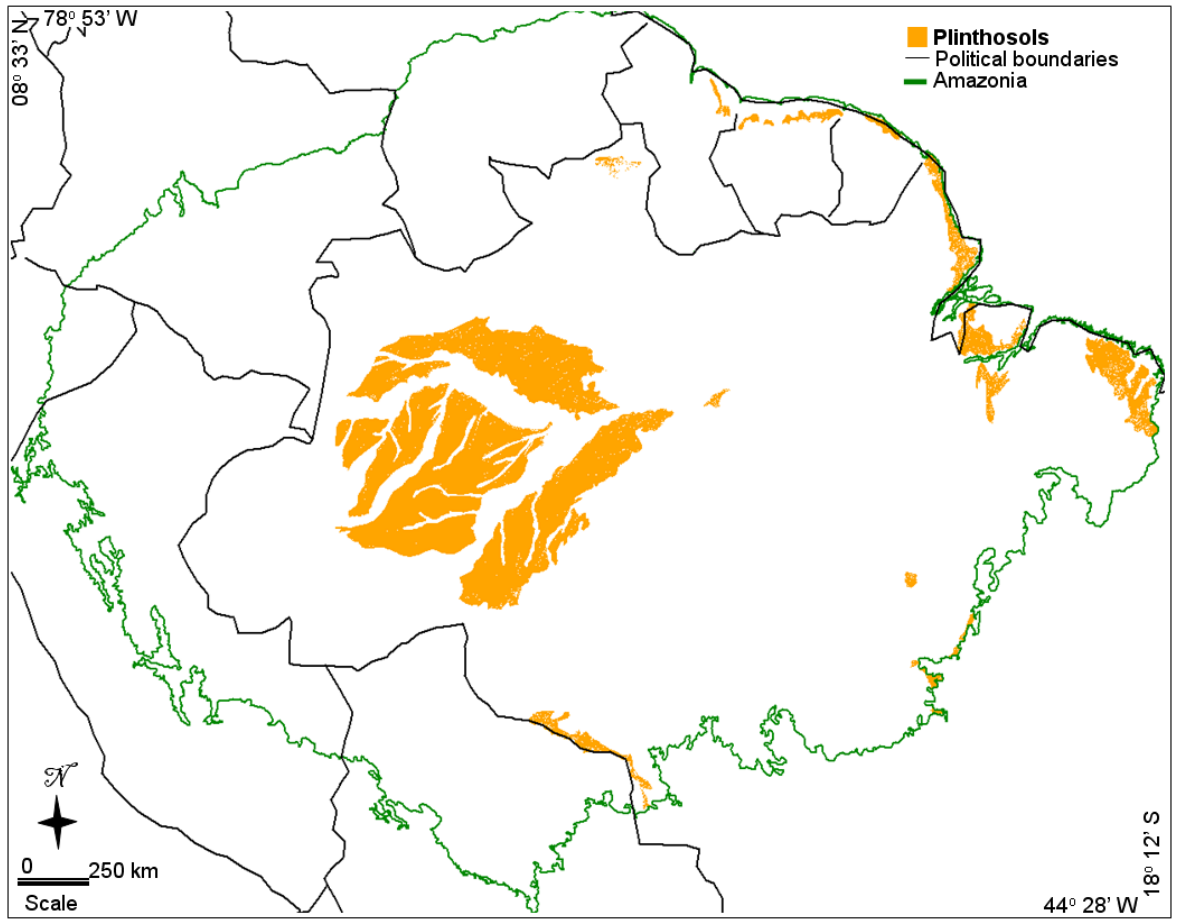

Fig. S3. Distribution of Plinthosols.

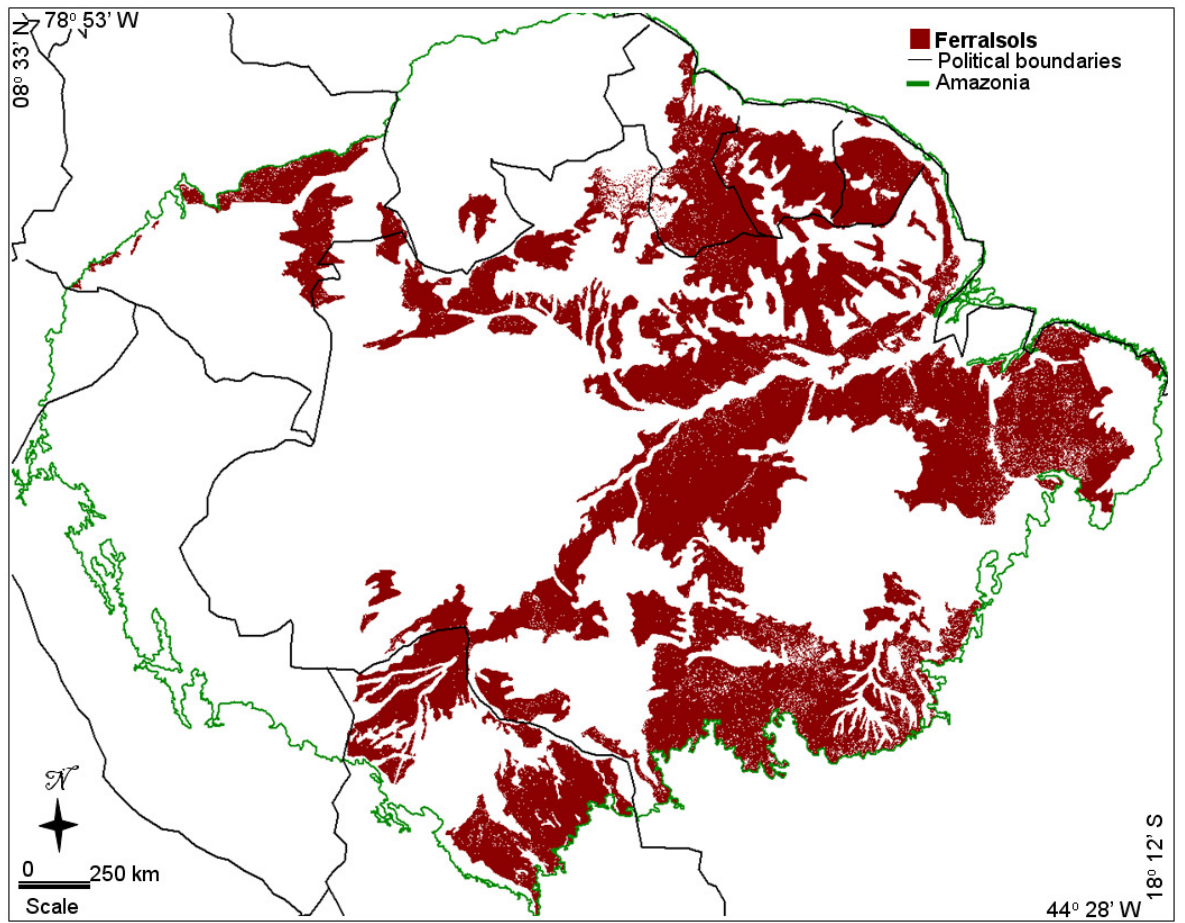

Fig. S4. Distribution of Ferralsols

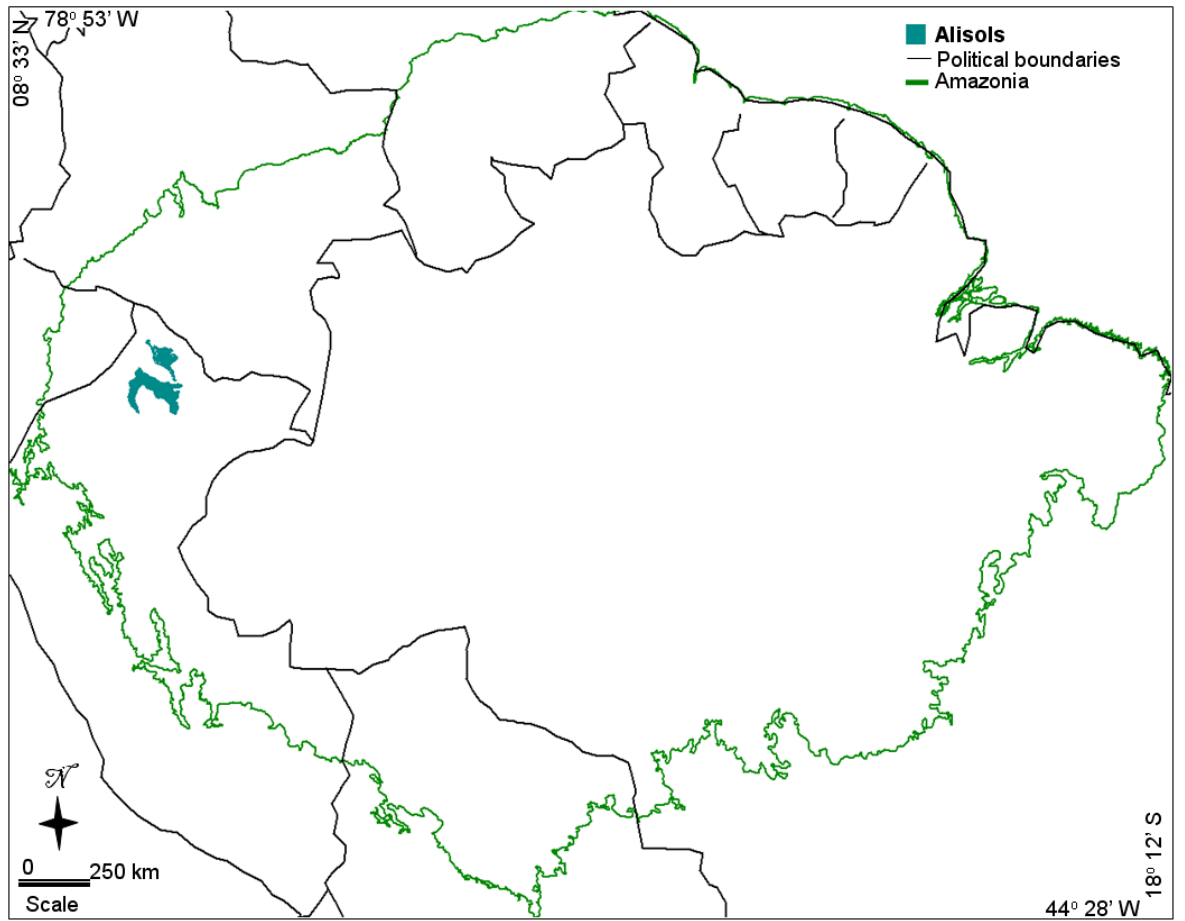

Fig. S5. Distribution of Alisols

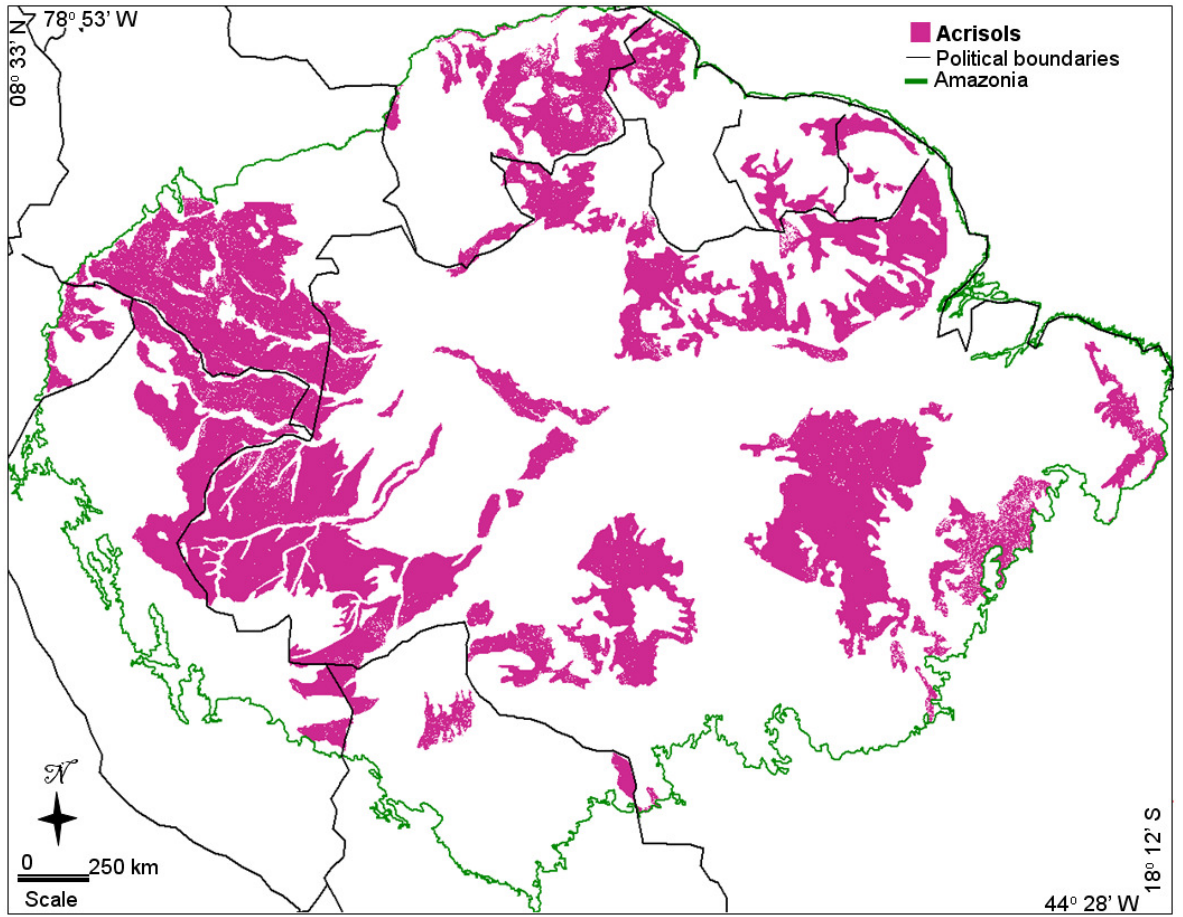

Fig. S6. Distribution of Acrisols.

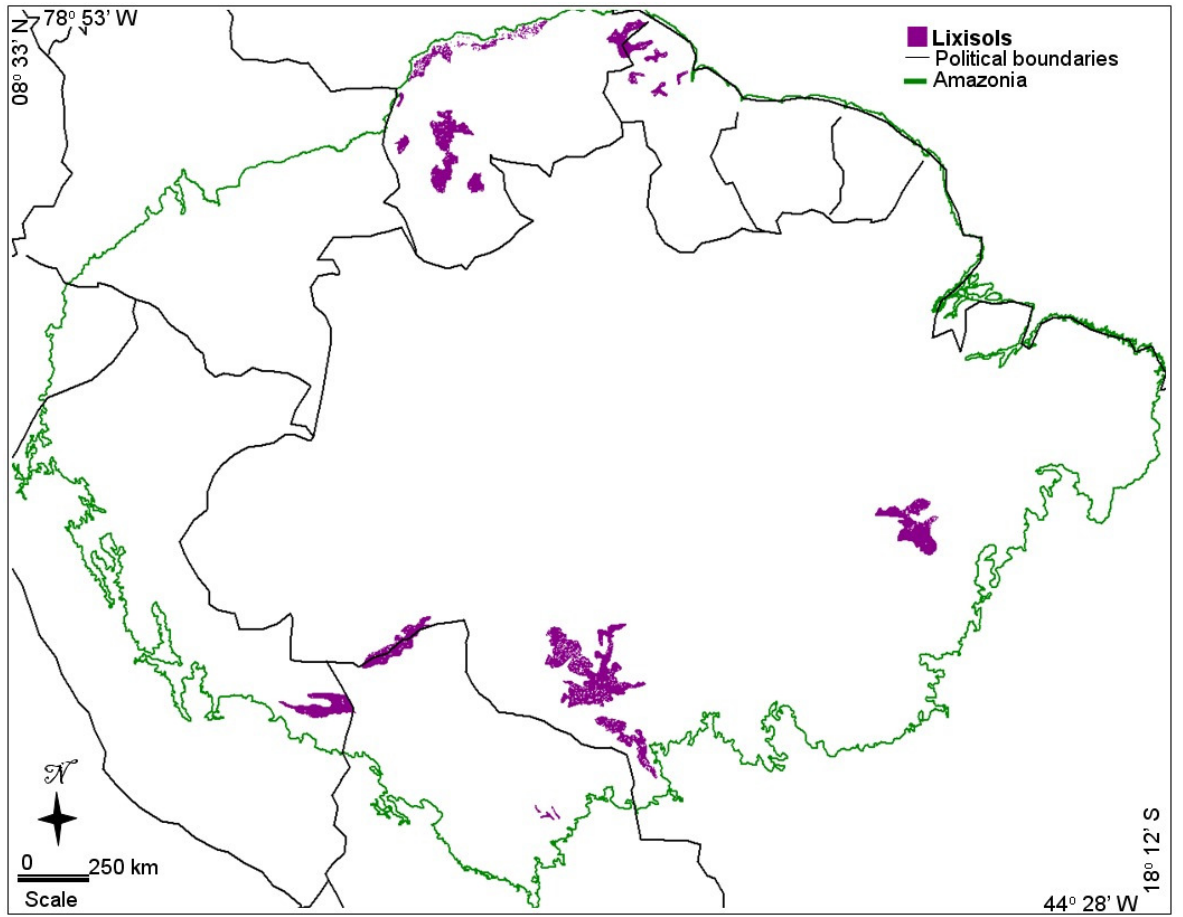

Fig. S7. Distribution of Lixisols.

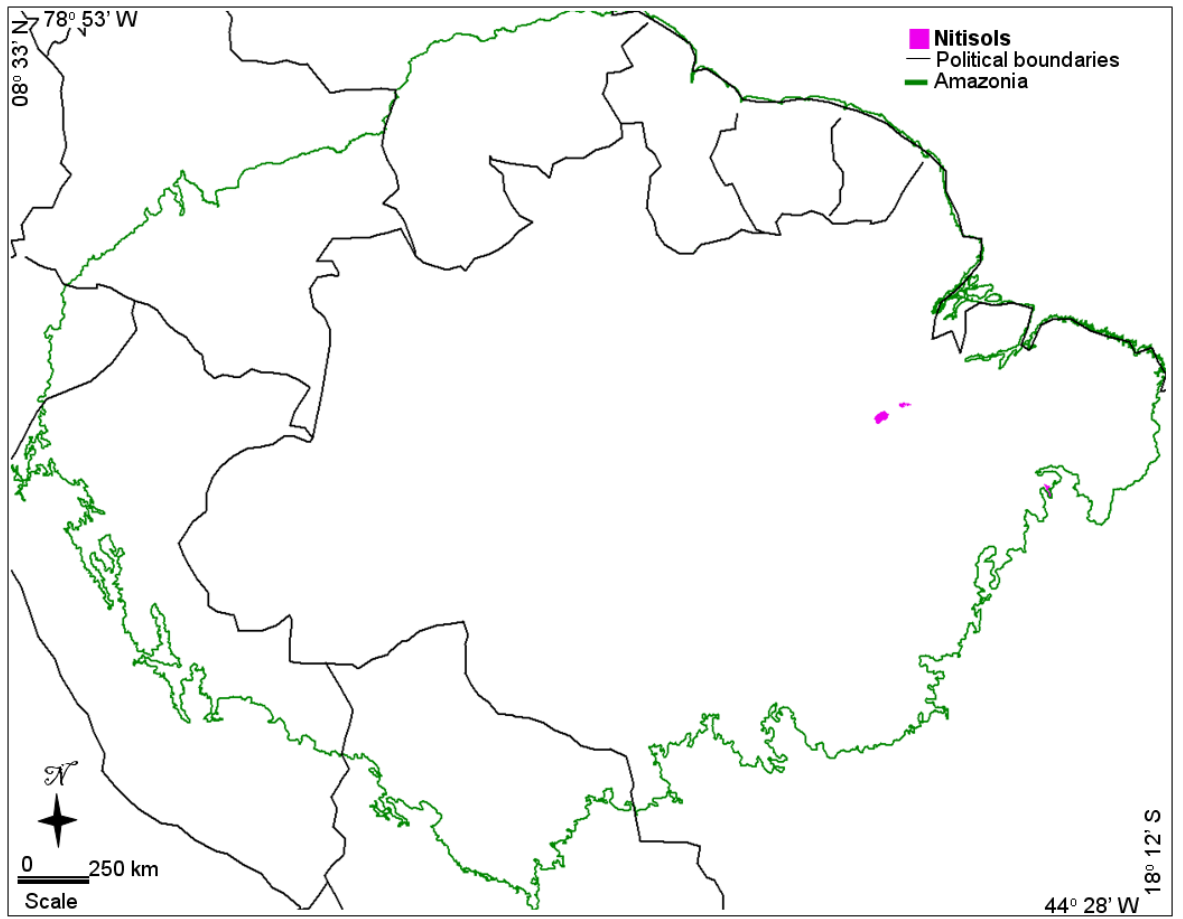

Fig. S8. Distribution of Nitisols.



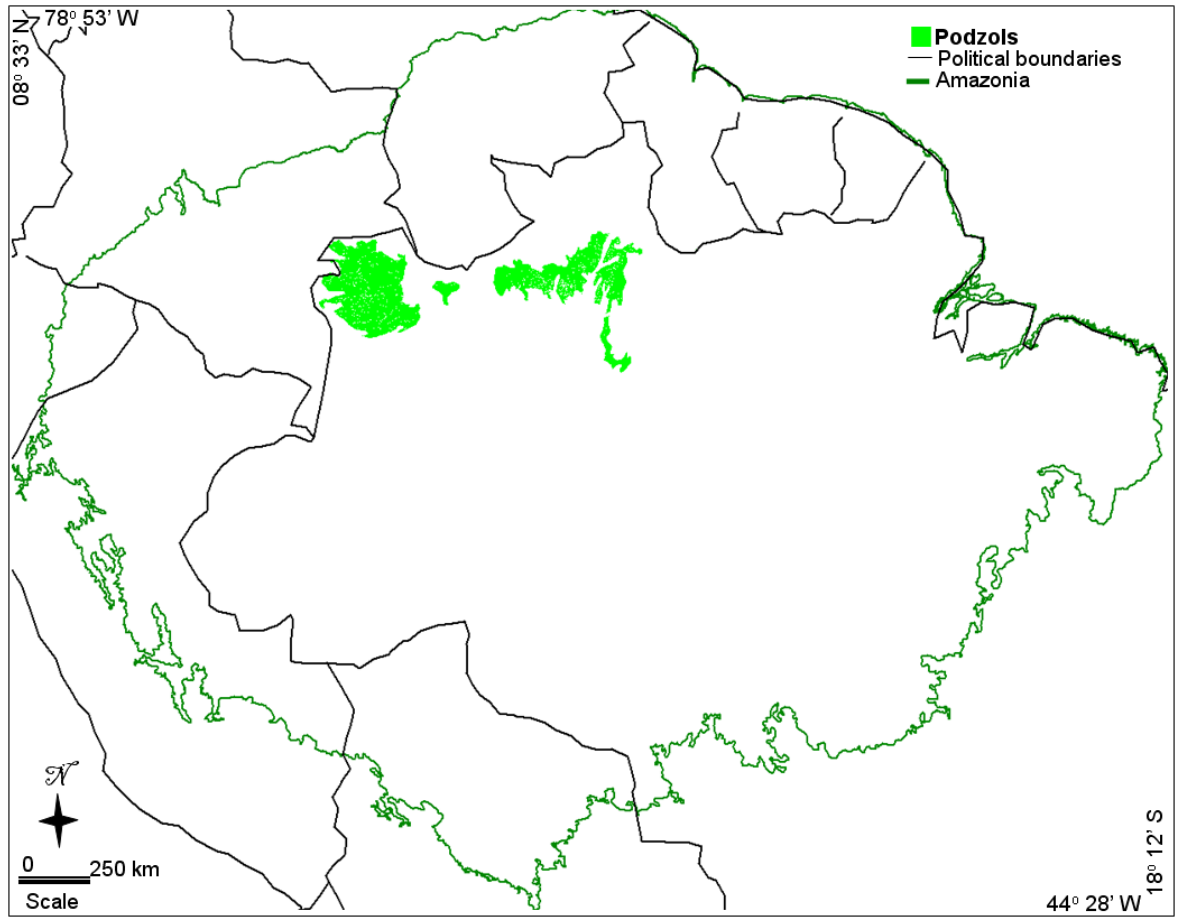

Fig. S9. Distribution of Podzols.

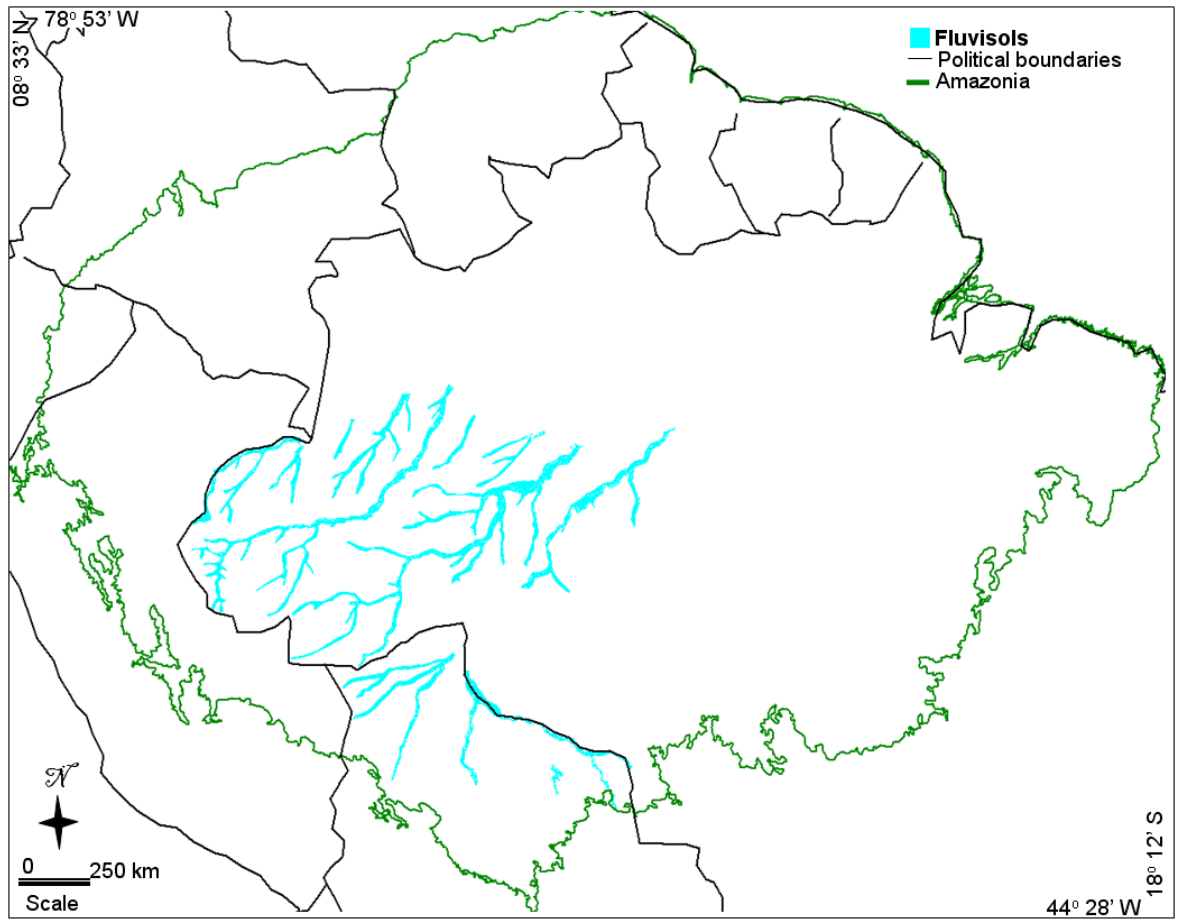

Fig. S10. Distribution of Fluvisols.

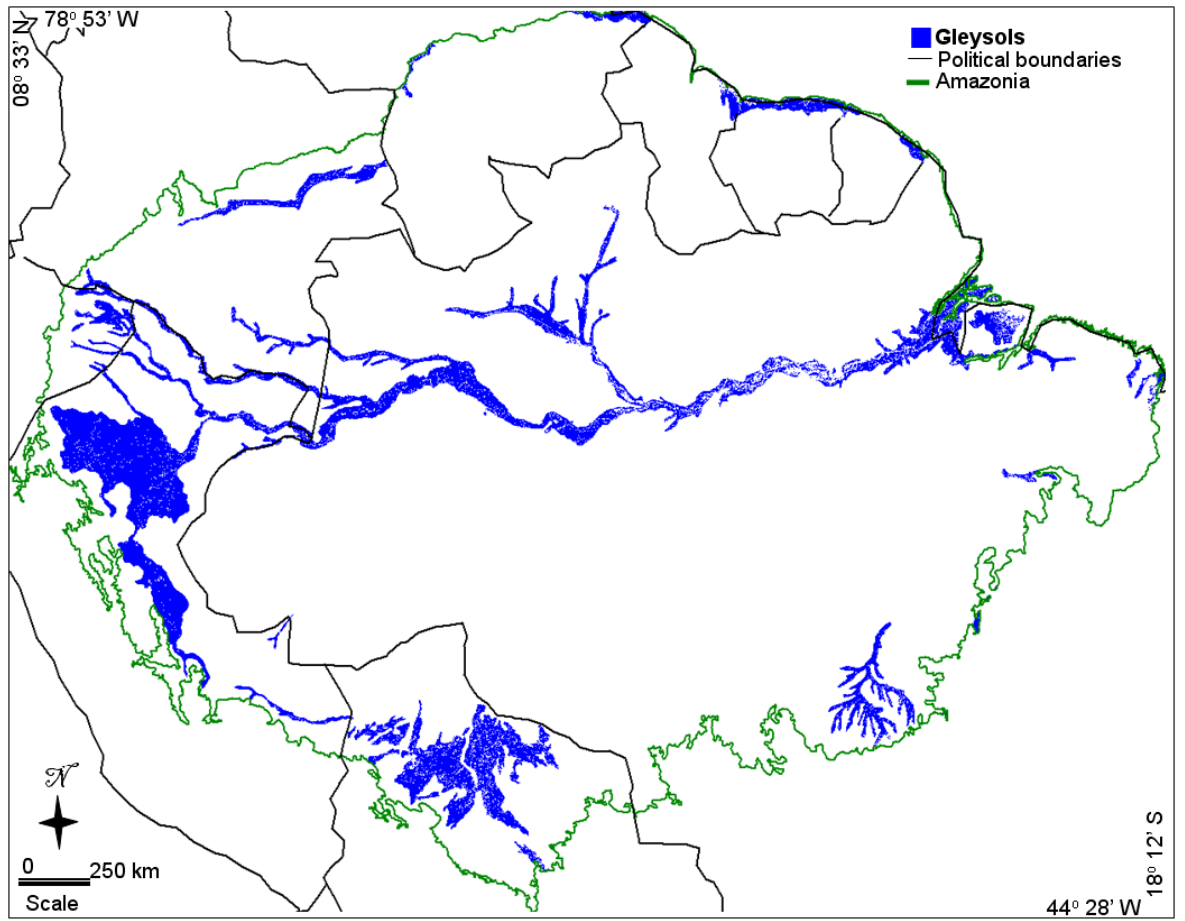

Fig. S11. Distribution of Gleysols.

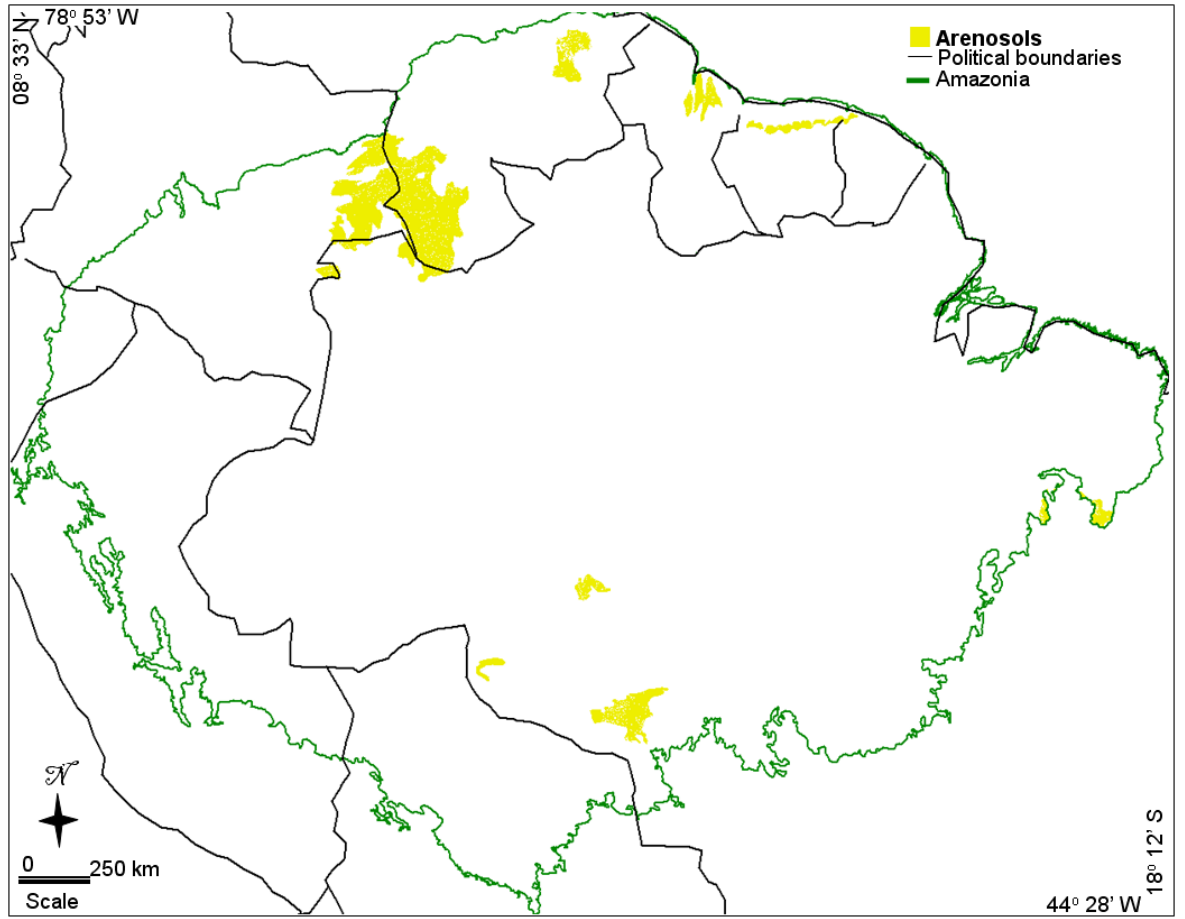

Fig. S12. Distribution of Arenosols.

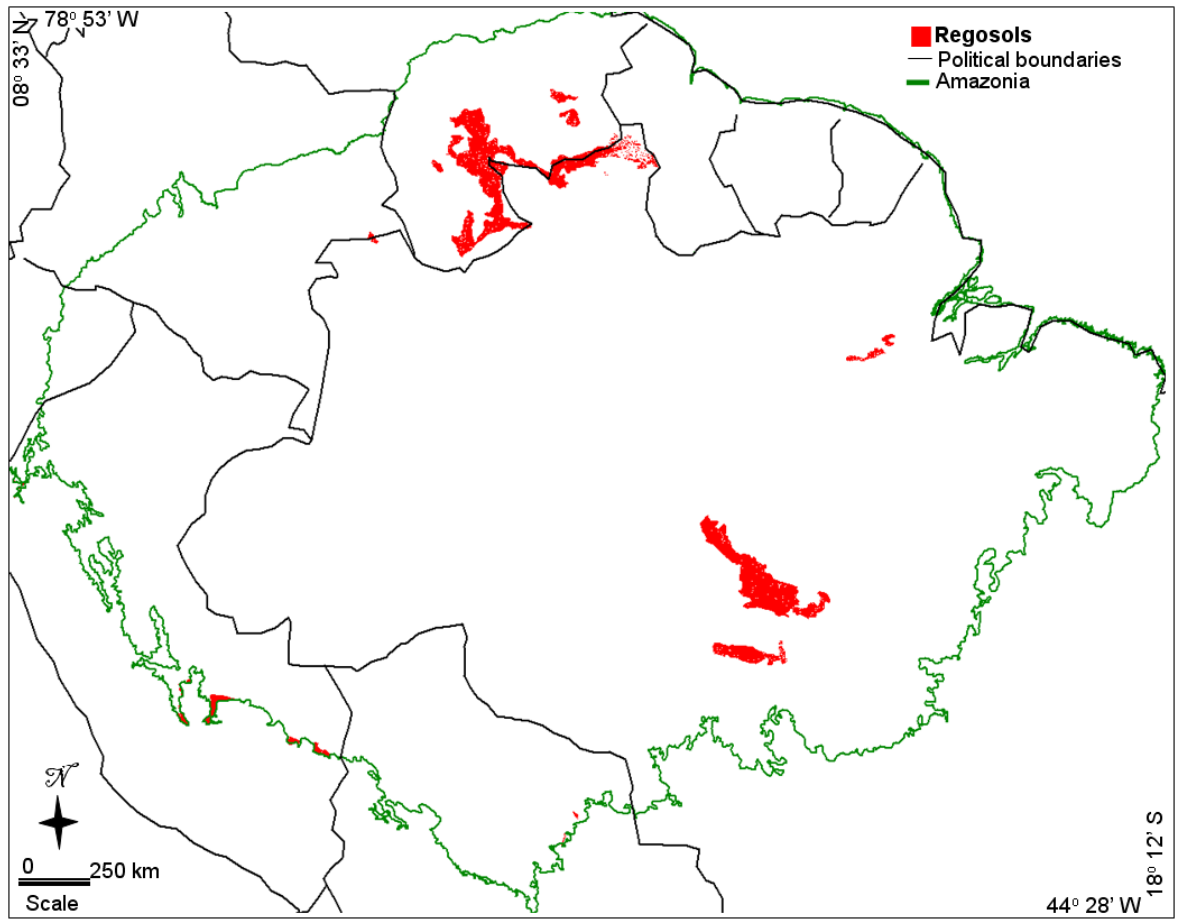

Fig. S13. Distribution of Regosols.

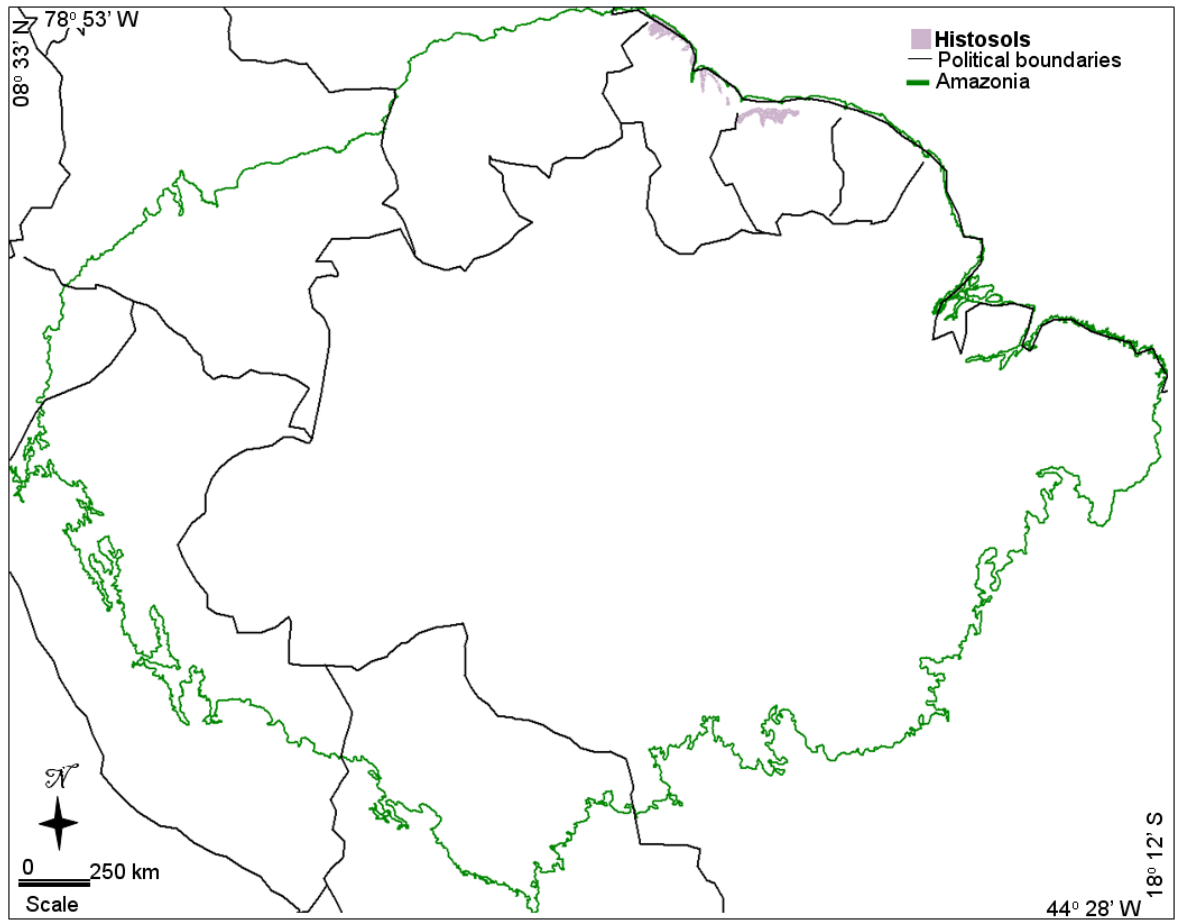

Fig. S14. Distribution of Histosols.
